# Supplementary material
Source: PubMed Central journal article supplement (PMC1810020)
Supplement: 15252993supp.pdf [file 15252993supp.pdf]

This is an electronic appendix to the Biology Letter by Koehler et al. 2004 The relationship between sexual dimorphism in human faces and fluctuating asymmetry. *Proc. R. Soc. Lond. B (Suppl.)* **271**, S233–S236. (DOI 10.1098/rsbl.2003.0146.)

Electronic appendices are refereed with the text. However, no attempt has been made to impose a uniform editorial style on the electronic appendices.

### Electronic Appendix A

Table 2. Sexual dimorphism in various facial traits (to the nearest pixel) from 94 males and 100 females. \*  $p < .05$ , \*\*  $p < .01$ , \*\*\*  $p < .001$

| Trait                  | Sex    | Mean  | Std. Dev. | t (d.f. = 192) |
|------------------------|--------|-------|-----------|----------------|
| face area below pupils | male   | 80383 | 6377      | 10.83***       |
|                        | female | 70030 | 6899      |                |
| eye area               | male   | 1157  | 201       | 0.13           |
|                        | female | 1153  | 200       |                |
| lip area               | male   | 3634  | 817       | 3.37***        |
|                        | female | 3252  | 763       |                |
| chin area              | male   | 4897  | 715       | 11.21***       |
|                        | female | 3771  | 684       |                |
| eyebrow height         | male   | 36    | 8         | -4.19***       |
|                        | female | 42    | 12        |                |
| cheekbone width        | male   | 354   | 22        | 4.60***        |
|                        | female | 341   | 19        |                |

|                   |        |     |    |          |
|-------------------|--------|-----|----|----------|
| jaw width         | male   | 315 | 23 | 6.10***  |
|                   | female | 296 | 20 |          |
| nostril width     | male   | 96  | 16 | 5.87***  |
|                   | female | 86  | 8  |          |
| lower face length | male   | 298 | 16 | 11.19*** |
|                   | female | 273 | 16 |          |

Note: eyebrow height only has df = 191 because one participant had no visible eyebrows

Table 3. Factor analysis used to calculate the sexual dimorphism score.

|                    | Axis 1                  | Axis 2   | Axis 3                      | Axis 4   |
|--------------------|-------------------------|----------|-----------------------------|----------|
| EigenValue         | 4.02                    | 1.31     | 1.04                        | 0.95     |
| Variance explained | 44.67%                  | 14.51%   | 11.57%                      | 10.50%   |
|                    | Rotated Factor loadings |          | Standard Score Coefficients |          |
|                    | Factor 1                | Factor 2 | Factor 1                    | Factor 2 |
| Face               | 0.92                    | 0.33     | 0.23                        | 0.08     |
| Chin               | 0.70                    | 0.09     | 0.20                        | -0.05    |
| Lip                | 0.41                    | 0.68     | 0.02                        | 0.42     |
| Cheekbone          | 0.83                    | 0.13     | 0.23                        | -0.04    |
| Jaw                | 0.84                    | 0.11     | 0.24                        | -0.06    |
| Nostril            | 0.20                    | 0.67     | -0.05                       | 0.44     |
| Eyebrow            | -0.40                   | 0.71     | -0.24                       | 0.57     |
| Lower face         | 0.79                    | 0.19     | 0.21                        | 0.01     |
| Eye                | 0.03                    | 0.05     | 0.00                        | 0.03     |
